# Supplementary material for: Identification of Essential Proteins Based on Ranking Edge-Weights in Protein-Protein Interaction Networks
Source: PLoS One. 2014 Sep 30;9(9):e108716. doi: 10.1371/journal.pone.0108716 (PMC4182551; doi:10.1371/journal.pone.0108716)
Supplement: File S4 — Protein-Protein Interaction Information of E. coli , include protein pairs' uniprot IDs, GO semantics similarity, gene co-expression and number of triangles an edge belongs. (XLS) [file pone.0108716.s009.xls]

## Sheet: Ecoli_supdata2
ProteinA UniprotID	ProteinB UniprotID	PCC	GE	NTE
O32528	P02996	0.05	0	1
P00350	P00393	0.723328	2.68524	1
P00350	P02918	0.523631	1.28029	1
P00350	P09832	0.748492	2.50926	1
P00350	P0ABU7	-0.320703	0.969758	1
P00350	P0AEI4	-0.252108	0.939899	1
P00350	P25526	-0.713304	2.42691	2
P00350	P33195	0.761851	2.91995	3
P00350	P37902	-0.457406	0	2
P00350	P39274	-0.520351	0	1
P00363	P00364	0.05	0	2
P00363	P03805	0.05	0	2
P00363	P08409	0.05	0	1
P00363	P0A9L8	-0.747814	2.28707	1
P00363	P0ACB4	0.668323	4.27738	1
P00363	P31473	0.672296	1.28323	1
P00363	P76111	-0.016429	3.08761	1
P00364	P03805	0.05	0	3
P00364	P03806	0.05	0	2
P00379	P02410	0.05	0	1
P00379	P16659	0.05	0	1
P00379	P31474	0.05	0	1
P00379	P39401	0.05	0	1
P00379	P46130	0.05	0	1
P00379	P80645	0.05	0	1
P00391	P00475	0.05	0	1
P00391	P00482	0.05	0	2
P00391	P00490	0.05	0	9
P00391	P00582	0.05	0	4
P00391	P00647	0.05	0	6
P00391	P00892	0.05	0	3
P00391	P02901	0.05	0	2
P00391	P03004	0.05	0	1
P00391	P03018	0.05	0	4
P00391	P04993	0.05	0	4
P00391	P06143	0.05	0	1
P00391	P06277	0.05	0	2
P00391	P06612	0.05	0	6
P00391	P07015	0.05	0	3
P00391	P07016	0.05	0	3
P00391	P07025	0.05	0	4
P00391	P07027	0.05	0	1
P00391	P07028	0.05	0	5
P00391	P08142	0.05	0	1
P00391	P08394	0.05	0	2
P00391	P09030	0.05	0	2
P00391	P09097	0.05	0	3
P00391	P09168	0.05	0	2
P00391	P0A6F5	0.05	0	11
P00391	P10443	0.05	0	3
P00391	P10485	0.05	0	4
P00391	P10486	0.05	0	2
P00391	P11351	0.05	0	1
P00391	P11555	0.05	0	2
P00391	P12638	0.05	0	3
P00391	P14294	0.05	0	6
P00391	P15043	0.05	0	4
P00391	P17113	0.05	0	1
P00391	P20082	0.05	0	2
P00391	P20625	0.05	0	1
P00391	P21202	0.05	0	1
P00391	P21893	0.05	0	4
P00391	P23839	0.05	0	1
P00391	P23892	0.05	0	2
P00391	P24188	0.05	0	1
P00391	P24236	0.05	0	1
P00391	P25522	0.05	0	1
P00391	P27305	0.05	0	1
P00391	P27851	0.05	0	1
P00391	P28688	0.05	0	2
P00391	P29209	0.05	0	3
P00391	P29210	0.05	0	2
P00391	P31473	0.05	0	3
P00391	P31806	0.05	0	2
P00391	P32049	0.05	0	3
P00391	P32177	0.05	0	1
P00391	P32679	0.05	0	5
P00391	P33371	0.05	0	2
P00391	P33916	0.05	0	2
P00391	P33937	0.05	0	1
P00391	P36979	0.05	0	2
P00391	P36995	0.05	0	1
P00391	P37024	0.05	0	3
P00391	P37163	0.05	0	1
P00391	P37175	0.05	0	1
P00391	P37326	0.05	0	1
P00391	P39299	0.05	0	3
P00391	P39346	0.05	0	1
P00391	P43329	0.05	0	5
P00391	P45465	0.05	0	1
P00391	P45527	0.05	0	2
P00391	P45571	0.05	0	3
P00391	P50465	0.05	0	3
P00391	P52037	0.05	0	1
P00391	P52648	0.05	0	2
P00391	P75767	0.05	0	1
P00391	P75829	0.05	0	1
P00391	P75989	0.05	0	1
P00391	P75990	0.05	0	2
P00391	P76086	0.05	0	1
P00391	P76170	0.05	0	1
P00391	P76503	0.05	0	2
P00391	P76594	0.05	0	3
P00391	P77302	0.05	0	1
P00391	P77349	0.05	0	4
P00391	P77399	0.05	0	2
P00391	P77574	0.05	0	1
P00391	P77721	0.05	0	1
P00391	Q46802	0.05	0	1
P00391	Q57451	0.05	0	1
P00393	P0A6N1	0.49739	0	1
P00393	P0ADQ7	-0.479693	0	2
P00393	P0AFP6	-0.303689	0	1
P00393	P67910	0.550491	1.77561	2
P00394	P0A6F5	0.05	0	1
P00452	P00453	0.05	0	6
P00452	P02990	0.05	0	4
P00452	P07004	-0.267117	2.22505	1
P00452	P0A6N1	0.617613	0	5
P00452	P0A8A2	0.571746	1.7083	1
P00452	P0A9X4	0.634331	1.49816	2
P00452	P13519	0.05	0	4
P00452	P37146	-0.041453	5.86572	3
P00452	P39452	-0.013282	5.86572	3
P00452	P76351	0.05	0	1
P00452	P76558	-0.470353	3.0066	1
P00453	P00583	0.05	0	1
P00453	P02990	0.05	0	5
P00453	P04475	0.05	0	4
P00453	P0A6N1	0.05	0	5
P00453	P13519	0.05	0	5
P00453	P16917	0.05	0	1
P00453	P37146	0.05	0	3
P00453	P39452	0.05	0	3
P00475	P02420	0.05	0	2
P00475	P02423	0.05	0	2
P00475	P06958	0.05	0	1
P00475	P09156	0.05	0	1
P00475	P13035	0.05	0	1
P00475	P37342	0.05	0	1
P00478	P00479	0.05	0	1
P00479	P0A6F5	0.05	0	1
P00482	P02351	0.05	0	9
P00482	P02352	0.05	0	8
P00482	P02354	0.05	0	7
P00482	P02356	0.05	0	13
P00482	P02361	0.05	0	5
P00482	P02363	0.05	0	3
P00482	P02364	0.05	0	4
P00482	P02386	0.05	0	7
P00482	P02387	0.05	0	8
P00482	P02388	0.05	0	16
P00482	P02390	0.05	0	6
P00482	P02392	0.05	0	10
P00482	P02409	0.05	0	3
P00482	P02410	0.05	0	4
P00482	P02413	0.05	0	4
P00482	P02418	0.05	0	5
P00482	P02420	0.05	0	8
P00482	P02423	0.05	0	6
P00482	P02425	0.05	0	5
P00482	P02428	0.05	0	6
P00482	P02436	0.05	0	1
P00482	P02901	0.05	0	6
P00482	P02990	0.05	0	5
P00482	P03002	0.05	0	7
P00482	P0A6N1	0.05	0	7
P00482	P21507	0.05	0	11
P00482	P37765	0.05	0	18
P00490	P00577	0.05	0	12
P00490	P00582	0.652831	1.32727	15
P00490	P00647	0.05	0	7
P00490	P02339	0.05	0	10
P00490	P02341	0.05	0	10
P00490	P02342	0.05	0	14
P00490	P02384	0.05	0	5
P00490	P02386	0.05	0	13
P00490	P02388	0.05	0	13
P00490	P02410	0.05	0	12
P00490	P02418	0.05	0	4
P00490	P02420	0.05	0	8
P00490	P02422	0.05	0	6
P00490	P02423	0.05	0	10
P00490	P03018	-0.223383	1.7083	9
P00490	P05055	0.418103	2.47866	14
P00490	P05719	0.92888	1.277	4
P00490	P06612	-0.363969	1.49816	19
P00490	P06959	0.794906	2.186	9
P00490	P08936	0.05	0	10
P00490	P09030	0.183104	1.32727	4
P00490	P0A715	0.907535	2.15714	6
P00490	P0A7K6	0.363528	1.60977	7
P00490	P0A7L0	0.325658	1.6344	6
P00490	P0A7R1	0.722674	1.60977	7
P00490	P0A7T3	0.12458	1.6344	6
P00490	P0A7Y4	0.105437	2.85755	5
P00490	P0A832	0.286942	1.7083	5
P00490	P0A8M6	0.764783	0	12
P00490	P0A8T7	-0.056748	1.5596	5
P00490	P0AA10	0.392403	1.65576	9
P00490	P0ABT5	0.33362	1.63533	2
P00490	P0ABU7	-0.409362	0.641326	7
P00490	P0ACF0	0.72795	1.10289	16
P00490	P0ACF4	0.753032	1.277	9
P00490	P0AG48	0.311231	1.60977	9
P00490	P0AGE0	0.030453	1.10289	5
P00490	P0AGK4	0.455159	0	6
P00490	P10485	0.05	0	8
P00490	P12638	0.05	0	3
P00490	P32052	0.05	0	4
P00490	P32679	0.05	0	9
P00490	P37765	-0.328314	1.277	23
P00490	P39274	-0.416727	0	3
P00490	P42550	0.05	0	7
P00490	P68739	0.244679	1.7083	4
P00490	P76049	-0.670544	0	1
P00490	P76268	0.358396	1.277	5
P00490	P76550	0.532196	0	4
P00509	P0A850	-0.054052	2.35343	2
P00509	P20605	-0.576603	0	1
P00509	P33599	0.866426	1.31926	1
P00509	P37685	-0.441672	0.627094	1
P00509	P37747	0.575881	1.36032	2
P00550	P0A6G7	-0.322598	0.427711	1
P00550	P19245	0.05	0	1
P00561	P03005	0.05	0	1
P00561	P0A6H5	-0.136478	1.32668	1
P00561	P0ACB0	-0.264927	1.30456	1
P00561	P32168	0.05	0	1
P00562	P0A9B2	0.313484	2.6714	1
P00574	P00575	0.05	0	41
P00574	P00577	0.05	0	44
P00574	P00579	0.05	0	29
P00574	P00580	0.05	0	8
P00574	P00582	0.05	0	14
P00574	P02339	0.05	0	16
P00574	P02341	0.05	0	13
P00574	P02342	0.05	0	15
P00574	P02349	0.05	0	10
P00574	P02351	0.05	0	24
P00574	P02352	0.05	0	23
P00574	P02354	0.05	0	19
P00574	P02356	0.05	0	37
P00574	P02358	0.05	0	13
P00574	P02359	0.05	0	18
P00574	P02364	0.05	0	19
P00574	P02369	0.05	0	15
P00574	P02370	0.05	0	10
P00574	P02371	0.05	0	4
P00574	P02372	0.05	0	5
P00574	P02375	0.05	0	5
P00574	P02378	0.05	0	8
P00574	P02379	0.05	0	8
P00574	P02384	0.05	0	17
P00574	P02386	0.05	0	29
P00574	P02387	0.05	0	20
P00574	P02388	0.05	0	34
P00574	P02389	0.05	0	10
P00574	P02392	0.05	0	28
P00574	P02410	0.05	0	17
P00574	P02413	0.05	0	10
P00574	P02414	0.05	0	4
P00574	P02420	0.05	0	17
P00574	P02422	0.05	0	13
P00574	P02424	0.05	0	20
P00574	P02425	0.05	0	11
P00574	P02427	0.05	0	4
P00574	P02428	0.05	0	13
P00574	P02436	0.05	0	11
P00574	P03002	0.05	0	12
P00574	P03003	0.05	0	21
P00574	P03019	0.05	0	2
P00574	P03020	0.05	0	8
P00574	P04790	0.05	0	3
P00574	P05055	0.05	0	24
P00574	P05838	0.05	0	4
P00574	P05852	0.05	0	6
P00574	P06612	0.05	0	22
P00574	P06613	0.05	0	2
P00574	P06958	0.05	0	6
P00574	P06959	0.05	0	6
P00574	P06977	0.05	0	6
P00574	P07012	0.05	0	11
P00574	P08374	0.05	0	20
P00574	P08390	0.05	0	6
P00574	P08504	0.05	0	4
P00574	P0A6F5	0.05	0	13
P00574	P10411	0.05	0	2
P00574	P11028	0.05	0	15
P00574	P13445	0.05	0	6
P00574	P13519	0.05	0	10
P00574	P14374	0.05	0	14
P00574	P15277	0.05	0	15
P00574	P16921	0.05	0	25
P00574	P21346	0.05	0	14
P00574	P21889	0.05	0	1
P00574	P22539	0.05	0	1
P00574	P23830	0.05	0	17
P00574	P23852	0.05	0	9
P00574	P24255	0.05	0	6
P00574	P24285	0.05	0	2
P00574	P25521	0.05	0	31
P00574	P27242	0.05	0	1
P00574	P27836	0.05	0	1
P00574	P30128	0.05	0	6
P00574	P31690	0.05	0	9
P00574	P31804	0.05	0	4
P00574	P32679	0.05	0	17
P00574	P36996	0.05	0	28
P00574	P42641	0.05	0	2
P00574	P45567	0.05	0	29
P00574	P45571	0.05	0	21
P00574	P76211	0.05	0	9
P00574	P77071	0.05	0	3
P00574	Q46906	0.05	0	7
P00575	P00577	0.05	0	37
P00575	P00579	0.05	0	18
P00575	P00580	0.05	0	6
P00575	P00582	0.05	0	9
P00575	P00824	0.05	0	4
P00575	P00892	0.05	0	13
P00575	P02339	0.05	0	16
P00575	P02342	0.05	0	12
P00575	P02352	0.05	0	15
P00575	P02356	0.05	0	24
P00575	P02358	0.05	0	14
P00575	P02364	0.05	0	14
P00575	P02370	0.05	0	9
P00575	P02378	0.05	0	7
P00575	P02379	0.05	0	6
P00575	P02387	0.05	0	18
P00575	P02388	0.05	0	26
P00575	P02392	0.05	0	24
P00575	P02409	0.05	0	3
P00575	P02423	0.05	0	16
P00575	P02436	0.05	0	5
P00575	P02990	0.05	0	19
P00575	P03002	0.05	0	13
P00575	P03003	0.05	0	16
P00575	P03018	0.05	0	12
P00575	P05826	0.05	0	1
P00575	P05838	0.05	0	5
P00575	P05852	0.05	0	6
P00575	P06612	0.05	0	14
P00575	P06613	0.05	0	2
P00575	P06961	0.05	0	2
P00575	P06977	0.05	0	8
P00575	P07655	0.05	0	6
P00575	P08374	0.05	0	16
P00575	P08390	0.05	0	8
P00575	P08936	0.05	0	10
P00575	P0A6F5	0.05	0	14
P00575	P0A6N1	0.05	0	23
P00575	P10408	0.05	0	18
P00575	P13445	0.05	0	6
P00575	P13519	0.05	0	14
P00575	P14825	0.05	0	11
P00575	P15716	0.05	0	14
P00575	P16921	0.05	0	20
P00575	P19675	0.05	0	10
P00575	P21346	0.05	0	12
P00575	P23367	0.05	0	3
P00575	P23839	0.05	0	3
P00575	P23852	0.05	0	8
P00575	P24211	0.05	0	1
P00575	P24255	0.05	0	5
P00575	P25521	0.05	0	17
P00575	P25539	0.05	0	4
P00575	P29209	0.05	0	9
P00575	P29211	0.05	0	1
P00575	P30128	0.05	0	4
P00575	P31690	0.05	0	9
P00575	P31804	0.05	0	4
P00575	P37195	0.05	0	5
P00575	P37618	0.05	0	3
P00575	P38684	0.05	0	1
P00575	P39312	0.05	0	1
P00575	P45567	0.05	0	18
P00575	P75694	0.05	0	1
P00575	P75767	0.05	0	7
P00575	P75776	0.05	0	2
P00575	P76008	0.05	0	1
P00575	P76211	0.05	0	7
P00575	P77071	0.05	0	3
P00575	P77611	0.05	0	1
P00575	Q46814	0.05	0	1
P00577	P00579	0.05	0	18
P00577	P00580	0.05	0	8
P00577	P00582	0.05	0	9
P00577	P00892	0.05	0	22
P00577	P02339	0.05	0	16
P00577	P02342	0.05	0	16
P00577	P02352	0.05	0	22
P00577	P02354	0.05	0	21
P00577	P02356	0.05	0	29
P00577	P02359	0.05	0	23
P00577	P02364	0.05	0	18
P00577	P02369	0.05	0	15
P00577	P02372	0.05	0	11
P00577	P02386	0.05	0	29
P00577	P02387	0.05	0	25
P00577	P02388	0.05	0	37
P00577	P02410	0.05	0	21
P00577	P02413	0.05	0	13
P00577	P02414	0.05	0	5
P00577	P02416	0.05	0	9
P00577	P02418	0.05	0	13
P00577	P02420	0.05	0	22
P00577	P02423	0.05	0	23
P00577	P02425	0.05	0	16
P00577	P03003	0.05	0	20
P00577	P05082	0.05	0	1
P00577	P05838	0.05	0	5
P00577	P06612	0.05	0	19
P00577	P06977	0.05	0	6
P00577	P06983	0.05	0	1
P00577	P08374	0.05	0	16
P00577	P08390	0.05	0	5
P00577	P08504	0.05	0	4
P00577	P08622	0.05	0	16
P00577	P08756	0.05	0	16
P00577	P08936	0.05	0	10
P00577	P10413	0.05	0	4
P00577	P11028	0.05	0	12
P00577	P11989	0.05	0	1
P00577	P13445	0.05	0	4
P00577	P13519	0.05	0	9
P00577	P14825	0.05	0	12
P00577	P15716	0.05	0	16
P00577	P16921	0.05	0	17
P00577	P17580	0.05	0	23
P00577	P19245	0.05	0	10
P00577	P21346	0.05	0	11
P00577	P21501	0.05	0	1
P00577	P22255	0.05	0	1
P00577	P23484	0.05	0	1
P00577	P23852	0.05	0	9
P00577	P24255	0.05	0	6
P00577	P25521	0.05	0	22
P00577	P28632	0.05	0	4
P00577	P29209	0.05	0	6
P00577	P30128	0.05	0	5
P00577	P31690	0.05	0	9
P00577	P31804	0.05	0	4
P00577	P32689	0.05	0	1
P00577	P36540	0.05	0	3
P00577	P36659	0.05	0	15
P00577	P36979	0.05	0	22
P00577	P37195	0.05	0	5
P00577	P45567	0.05	0	21
P00577	P45571	0.05	0	15
P00577	P75829	0.05	0	18
P00577	P76211	0.05	0	7
P00577	P76519	0.05	0	1
P00577	P77609	0.05	0	1
P00577	P77759	0.05	0	1
P00577	Q46906	0.05	0	6
P00579	P02349	0.05	0	4
P00579	P02351	0.05	0	11
P00579	P02352	0.05	0	10
P00579	P02354	0.05	0	9
P00579	P02356	0.05	0	17
P00579	P02358	-0.035835	1.76203	7
P00579	P02359	0.449971	1.79869	8
P00579	P02384	0.05	0	7
P00579	P02387	0.05	0	10
P00579	P02388	0.05	0	14
P00579	P02392	0.05	0	12
P00579	P02413	0.508314	1.76203	6
P00579	P02420	0.05	0	6
P00579	P02422	0.05	0	3
P00579	P02423	0.05	0	7
P00579	P02428	0.05	0	3
P00579	P02990	0.05	0	6
P00579	P02995	0.05	0	4
P00579	P03002	0.05	0	7
P00579	P03003	0.05	0	17
P00579	P03019	0.05	0	2
P00579	P03020	0.05	0	4
P00579	P06134	0.56249	2.42579	1
P00579	P06977	0.05	0	4
P00579	P08374	0.05	0	11
P00579	P08504	0.05	0	3
P00579	P09377	0.544796	2.63636	1
P00579	P09378	0.42572	2.63636	1
P00579	P0A705	0.327424	1.6758	2
P00579	P0A7K2	0.146591	1.76203	4
P00579	P0A7K6	0.123548	1.76203	4
P00579	P0A7L0	0.161453	2.1755	4
P00579	P0A7M2	-0.005151	1.76203	3
P00579	P0A7Z4	0.122242	2.1627	18
P00579	P0A800	-0.066579	1.54479	7
P00579	P0A8M6	-0.780831	0	12
P00579	P0A8T7	0.419684	2.1627	9
P00579	P0A8V2	0.413064	2.1627	13
P00579	P0A9B2	-0.534162	0.681327	4
P00579	P0AE60	0.373458	2.28531	5
P00579	P0AFF6	0.315633	2.71053	7
P00579	P0AG30	-0.13292	2.32419	4
P00579	P0AG48	0.092499	1.76203	3
P00579	P0AG67	0.390897	2.10033	3
P00579	P10411	0.05	0	2
P00579	P30867	0.05	0	3
P00579	P31690	0.05	0	5
P00579	P37095	-0.589458	1.10863	1
P00579	P60723	0.045505	2.52921	6
P00579	P76211	0.05	0	6
P00579	P76268	-0.606541	2.73136	4
P00579	P76367	0.05	0	1
P00579	P77071	0.05	0	3
P00579	P77319	0.379434	1.6638	2
P00580	P02354	0.05	0	4
P00580	P02386	0.05	0	4
P00580	P02392	0.05	0	4
P00580	P03003	0.05	0	6
P00580	P04475	0.05	0	4
P00580	P08622	0.05	0	4
P00580	P09372	0.05	0	4
P00580	P28304	0.05	0	2
P00580	P31690	0.05	0	4
P00581	P0AA25	0.05	0	1
P00582	P02341	0.05	0	9
P00582	P02342	0.05	0	11
P00582	P02351	0.05	0	9
P00582	P02388	0.05	0	10
P00582	P02392	0.05	0	5
P00582	P02410	0.05	0	7
P00582	P02428	0.05	0	3
P00582	P02990	0.05	0	5
P00582	P04384	0.05	0	3
P00582	P06959	0.40037	1.32727	5
P00582	P07012	0.133154	1.46309	6
P00582	P08936	0.05	0	7
P00582	P0A6N1	-0.267141	0	9
P00582	P0A6R3	-0.326523	1.76477	3
P00582	P0A715	0.661098	1.32727	3
P00582	P0A7Z4	-0.210015	2.28921	5
P00582	P0A817	0.530964	1.32727	2
P00582	P0A9W3	-0.517148	1.34746	1
P00582	P0ACF0	0.691901	2.73358	7
P00582	P0ACF4	0.674573	2.33194	6
P00582	P0ACI0	-0.065251	1.76477	4
P00582	P0ADM6	-0.272357	0	1
P00582	P10485	0.05	0	7
P00582	P11028	0.05	0	8
P00582	P11880	0.672251	1.32727	1
P00582	P14374	0.05	0	6
P00582	P30856	0.05	0	3
P00582	P31461	0.05	0	1
P00582	P33666	0.05	0	2
P00582	P43329	-0.46037	1.63104	6
P00582	P76268	0.662368	1.76477	5
P00582	P76550	0.59147	0	2
P00582	P77182	0.206101	1.32727	1
P00583	P03007	0.05	0	5
P00583	P06710	0.05	0	5
P00583	P07004	0.05	0	2
P00583	P0A6F9	0.05	0	2
P00583	P10443	0.05	0	5
P00583	P14825	0.05	0	1
P00583	P15277	0.05	0	2
P00583	P16659	0.05	0	2
P00583	P17288	0.05	0	1
P00583	P21599	0.05	0	1
P00583	P23243	0.05	0	1
P00583	P23892	0.05	0	1
P00583	P24182	0.05	0	2
P00583	P24233	0.05	0	1
P00583	P25887	0.05	0	1
P00583	P28630	0.05	0	6
P00583	P28905	0.05	0	5
P00583	P29132	0.05	0	1
P00583	P31221	0.05	0	1
P00583	P32661	0.05	0	1
P00583	P36950	0.05	0	1
P00583	P36995	0.05	0	3
P00583	P36997	0.05	0	2
P00583	P77225	0.05	0	1
P00583	P77391	0.05	0	1
P00583	P77395	0.05	0	2
P00583	P77482	0.05	0	1
P00584	P75767	0.05	0	1
P00634	P02995	0.05	0	1
P00634	P09546	0.452347	1.25364	1
P00634	P0A705	0.382255	1.4368	2
P00634	P0A759	-0.117242	0.916181	1
P00634	P0A944	0.140796	0.660253	1
P00634	P0ABG4	-0.136935	1.1037	1
P00634	P0ABU7	0.045619	0.838157	2
P00634	P10408	-0.296566	1.60367	1
P00634	P31133	0.302648	2.33927	1
P00634	P46923	-0.099414	2.33927	1
P00646	P02984	0.05	0	1
P00646	P19935	0.05	0	1
P00647	P02339	0.05	0	11
P00647	P02342	0.05	0	5
P00647	P02352	0.05	0	4
P00647	P02356	0.05	0	6
P00647	P02363	0.05	0	2
P00647	P02370	0.05	0	3
P00647	P02378	0.05	0	3
P00647	P02387	0.05	0	5
P00647	P02428	0.05	0	7
P00647	P04995	0.05	0	3
P00647	P06612	0.05	0	14
P00647	P06958	0.05	0	4
P00647	P06959	0.05	0	6
P00647	P14294	0.05	0	13
P00647	P15043	0.05	0	9
P00647	P17888	0.05	0	2
P00647	P21893	0.05	0	10
P00647	P42550	0.05	0	4
P00804	P0A7T3	0.474383	2.10701	1
P00804	P0A9D8	0.352004	0.850646	2
P00804	P0A9M2	0.633463	0.850646	2
P00805	P02918	0.430407	1.64956	1
P00805	P37751	0.198397	0.756164	1
P00822	P00824	0.05	0	4
P00822	P00831	0.05	0	4
P00822	P00837	0.05	0	3
P00822	P00859	0.05	0	3
P00824	P00831	0.05	0	5
P00824	P00832	0.05	0	3
P00824	P00837	0.05	0	4
P00824	P00855	0.05	0	2
P00824	P00859	0.05	0	4
P00824	P08622	0.05	0	3
P00824	P13519	0.05	0	4
P00824	P15038	0.05	0	1
P00824	P21346	0.05	0	2
P00824	P24199	0.05	0	1
P00824	P29209	0.05	0	4
P00831	P00832	0.05	0	4
P00831	P00837	0.05	0	5
P00831	P00844	0.05	0	4
P00831	P00859	0.05	0	4
P00832	P00837	0.05	0	4
P00832	P00844	0.05	0	3
P00837	P00844	0.05	0	3
P00837	P02424	0.05	0	1
P00837	P15277	0.05	0	1
P00844	P00855	0.05	0	2
P00844	P00859	0.05	0	3
P00855	P00859	0.05	0	3
P00855	P03007	0.05	0	1
P00861	P0AE88	0.171481	1.27129	1
P00861	P14825	0.05	0	1
P00861	P16244	0.05	0	1
P00861	P22257	0.05	0	1
P00864	P0A7M2	-0.110682	0.639416	1
P00864	P32053	0.876075	0.458724	1
P00864	P33195	0.786867	1.74592	1
P00864	P37330	0.377543	2.78228	1
P00886	P0A6F5	0.05	0	1
P00887	P0A6F5	0.462027	1.42492	1
P00891	P36995	0.05	0	1
P00891	P45567	0.05	0	1
P00892	P02341	0.05	0	8
P00892	P02342	0.05	0	14
P00892	P02349	0.05	0	14
P00892	P02351	0.05	0	22
P00892	P02352	0.05	0	22
P00892	P02354	0.05	0	18
P00892	P02356	0.05	0	31
P00892	P02358	0.05	1.43806	14
P00892	P02359	0.05	1.27129	20
P00892	P02369	0.05	0	15
P00892	P02370	0.05	0	14
P00892	P02372	0.05	0	8
P00892	P02374	0.05	0	10
P00892	P02378	0.05	0	12
P00892	P02384	0.05	0	19
P00892	P02386	0.05	0	24
P00892	P02387	0.05	0	19
P00892	P02388	0.05	0	31
P00892	P02389	0.05	0	7
P00892	P02390	0.05	0	11
P00892	P02392	0.05	0	21
P00892	P02410	0.05	0	18
P00892	P02411	0.05	0	7
P00892	P02413	0.05	1.43806	9
P00892	P02414	0.05	0	6
P00892	P02416	0.05	0	10
P00892	P02418	0.05	0	14
P00892	P02419	0.05	0	13
P00892	P02420	0.05	0	19
P00892	P02421	0.05	0	9
P00892	P02422	0.05	0	14
P00892	P02423	0.05	0	19
P00892	P02425	0.05	0	14
P00892	P02428	0.05	0	10
P00892	P02995	0.05	0	6
P00892	P06958	0.05	0	7
P00892	P06959	0.05	2.1148	6
P00892	P10408	0.05	1.1273	6
P00892	P15277	0.05	0	18
P00892	P17580	0.05	0	33
P00892	P21499	0.05	1.0073	39
P00892	P21507	0.05	0.856683	16
P00892	P23304	0.05	0	46
P00892	P23830	0.05	1.17927	16
P00892	P24245	0.05	0	25
P00892	P25888	0.05	0.841202	2
P00892	P30867	0.05	0	9
P00892	P30871	0.05	0.722766	9
P00892	P33224	0.05	1.00112	20
P00892	P33635	0.05	0	33
P00892	P36564	0.05	0	19
P00892	P36996	0.05	0	38
P00892	P37634	0.05	1.4044	6
P00892	P37765	0.05	1.20877	49
P00892	P42550	0.05	0	14
P00892	P43329	0.05	1.20877	16
P00892	P45571	0.05	0	36
P00892	P75828	0.05	0	1
P00892	P75864	0.05	1.62484	13
P00892	P75966	0.05	1.20877	4
P00892	P76116	0.05	0	6
P00892	Q46930	0.05	0	38
P00893	P0A6F5	-0.45078	1.1815	1
P00893	P0A7M2	-0.25286	1.43806	1
P00893	P0A7R1	-0.151856	1.43806	1
P00893	P0AFI7	0.780387	2.5274	1
P00893	P0AG67	-0.658372	1.43806	1
P00893	P52644	-0.478042	0	1
P00903	P05041	0.458803	4.74556	1
P00907	P00968	0.05	0	1
P00907	P22188	0.05	0	1
P00907	P45523	0.05	0	1
P00913	P04475	0.05	0	1
P00913	P14825	0.05	0	1
P00913	P77319	0.05	0	1
P00914	P32679	0.05	0	1
P00914	P68739	-0.305641	3.1214	1
P00914	P75876	-0.454846	1.92665	1
P00923	P03005	0.05	0	1
P00923	P08142	0.05	0	1
P00934	P0A7M2	-0.208402	1.34016	1
P00934	P0ACF8	-0.208081	1.39984	1
P00934	P0AET2	-0.025746	0.656637	2
P00934	P31677	-0.005135	0.893744	2
P00934	P37647	0.000499	1.96994	3
P00934	P38104	-0.131361	2.2051	3
P00944	P0A6N1	0.071163	0	1
P00946	P02918	0.382597	1.99225	1
P00946	P18196	0.780401	0.38278	1
P00946	P45748	-0.145112	1.7083	1
P00946	P75864	-0.10928	1.7083	1
P00946	P76161	-0.438424	1.6276	1
P00951	P04475	0.05	0	2
P00951	P07016	0.05	0	1
P00951	P10408	0.05	0	2
P00951	P45955	0.05	0	1
P00954	P02351	0.05	0	2
P00954	P02356	0.05	0	2
P00954	P02410	0.05	0	1
P00954	P02423	0.05	0	1
P00955	P02349	0.05	0	5
P00955	P02351	0.05	0	10
P00955	P02356	0.05	0	12
P00955	P02358	0.05	0	3
P00955	P02359	0.05	0	5
P00955	P02364	0.05	0	4
P00955	P02369	0.05	0	2
P00955	P02370	0.05	0	1
P00955	P02378	0.05	0	2
P00955	P02384	0.05	0	4
P00955	P02386	0.05	0	6
P00955	P02410	0.05	0	4
P00955	P02418	0.05	0	3
P00955	P02420	0.05	0	4
P00955	P02423	0.05	0	2
P00955	P04475	0.05	0	9
P00955	P08324	0.05	0	6
P00955	P0A6F5	0.05	0	5
P00955	P21346	0.05	0	7
P00955	P23839	0.05	0	3
P00955	P29209	0.05	0	6
P00955	P32661	0.05	0	3
P00955	P42550	0.05	0	5
P00955	P77558	0.05	0	1
P00956	P02925	0.542726	0.88201	1
P00956	P02990	0.05	0	2
P00956	P0A6N1	0.090177	0	2
P00956	P0A7B1	0.20989	1.30923	1
P00956	P0ACN4	-0.728922	2.37394	1
P00956	P0AE18	0.251658	2.37677	1
P00956	P19930	-0.051051	2.6189	1
P00956	P28688	0.05	0	1
P00956	P39336	-0.152849	0	1
P00956	P77734	0.05	0	1
P00957	P02351	0.05	0	4
P00957	P02990	0.05	0	3
P00957	P04475	0.05	0	4
P00957	P04805	-0.370499	4.51744	2
P00957	P06612	-0.216456	1.99801	2
P00957	P0A6N1	0.555731	0	4
P00957	P17169	0.403842	1.71182	1
P00957	P23325	-0.106434	0	1
P00957	P37765	-0.486753	2.81336	3
P00957	P76160	-0.302848	0	2
P00959	P0AFP6	0.019056	0	2
P00959	P0AG80	-0.163077	0.008009	2
P00959	P28903	0.52568	2.29046	1
P00960	P02351	0.05	0	7
P00960	P02352	0.05	0	5
P00960	P02356	0.05	0	9
P00960	P02369	0.05	0	5
P00960	P02372	0.05	0	2
P00960	P02388	0.05	0	9
P00960	P02390	0.05	0	3
P00960	P02410	0.05	0	3
P00960	P02414	0.05	0	1
P00960	P02420	0.05	0	4
P00960	P02422	0.05	0	3
P00960	P02423	0.05	0	5
P00960	P02428	0.05	0	2
P00960	P04384	0.05	0	4
P00960	P08622	-0.332079	2.56269	10
P00960	P0A6N1	0.589555	0	7
P00960	P0A7K6	0.567511	3.84146	1
P00960	P0A7M2	0.739109	3.84146	1
P00960	P0A7S9	0.357956	2.99046	2
P00960	P0A7T3	0.386915	2.92775	1
P00960	P0AA10	0.582604	3.84146	2
P00960	P0ADY7	0.651857	3.84146	1
P00960	P0AFP6	-0.141681	0	2
P00960	P0AG48	0.534167	3.84146	1
P00960	P0AG55	0.105157	2.8811	2
P00960	P13519	0.05	0	4
P00960	P18843	-0.188314	3.51296	1
P00960	P23865	0.367175	2.45655	1
P00960	P33232	-0.316325	1.48344	4
P00960	P60723	0.568314	3.19869	5
P00960	P62399	0.076557	3.84146	2
P00961	P06982	0.05	0	2
P00961	P09097	0.05	0	3
P00961	P0A6F5	-0.31826	2.38552	2
P00961	P0A8D0	0.385509	2.10427	1
P00961	P11457	0.05	0	1
P00961	P25538	0.05	0	1
P00961	P54901	-0.461219	2.10427	1
P00962	P0A8I5	-0.140069	3.43976	1
P00962	P21645	0.723613	1.39122	1
P00962	P21774	0.05	0	1
P00962	P32049	0.05	0	1
P00963	P0A836	-0.442882	2.91434	1
P00968	P04128	0.660626	0.374968	1
P00968	P0A6F1	0.86159	6.08226	1
P00968	P0A7R5	0.350279	2.7432	1
P00968	P17846	0.154502	3.15302	2
P00968	P21346	0.05	0	1
P00968	P30015	0.199473	0	1
P00968	P38038	0.201764	3.15302	2
P02339	P02342	0.05	0	13
P02339	P02354	0.05	0	6
P02339	P02364	0.05	0	10
P02339	P02379	0.05	0	4
P02339	P02386	0.05	0	14
P02339	P02387	0.05	0	11
P02339	P02388	0.05	0	20
P02339	P02392	0.05	0	12
P02339	P02420	0.05	0	13
P02339	P02423	0.05	0	16
P02339	P02425	0.05	0	7
P02339	P02428	0.05	0	10
P02339	P02436	0.05	0	10
P02339	P02990	0.05	0	11
P02339	P03007	0.05	0	13
P02339	P04475	0.05	0	15
P02339	P04995	0.05	0	4
P02339	P06612	0.05	0	20
P02339	P07375	0.05	0	2
P02339	P07376	0.05	0	2
P02339	P08177	0.05	0	7
P02339	P08936	0.05	0	10
P02339	P09097	0.05	0	5
P02339	P0A6N1	0.05	0	11
P02339	P10408	0.05	0	14
P02339	P10443	0.05	0	11
P02339	P14294	0.05	0	16
P02339	P15027	0.05	0	1
P02339	P15043	0.05	0	7
P02339	P17888	0.05	0	4
P02339	P20082	0.05	0	9
P02339	P20083	0.05	0	4
P02339	P21893	0.05	0	11
P02339	P24230	0.05	0	1
P02339	P25522	0.05	0	8
P02339	P27854	0.05	0	1
P02339	P28632	0.05	0	12
P02339	P28689	0.05	0	12
P02339	P28905	0.05	0	22
P02339	P30856	0.05	0	4
P02339	P31061	0.05	0	1
P02339	P33635	0.05	0	9
P02339	P46022	0.05	0	1
P02339	P75697	0.05	0	1
P02339	P77398	0.05	0	1
P02339	P80063	0.05	0	2
P02341	P02342	0.05	0	26
P02341	P02359	0.05	0	18
P02341	P02386	0.05	0	22
P02341	P02901	0.05	0	3
P02341	P02999	0.05	0	3
P02341	P03018	0.05	0	9
P02341	P04951	0.05	0	1
P02341	P06612	0.05	0	7
P02341	P06984	0.05	0	4
P02341	P07012	0.05	0	4
P02341	P07025	0.05	0	6
P02341	P08756	0.05	0	6
P02341	P08936	0.05	0	10
P02341	P10484	0.05	0	4
P02341	P10485	0.05	0	6
P02341	P11028	0.05	0	6
P02341	P11457	0.05	0	3
P02341	P15082	0.05	0	3
P02341	P15277	0.05	0	8
P02341	P15977	0.05	0	3
P02341	P19675	0.05	0	8
P02341	P23304	0.05	0	11
P02341	P25521	0.05	0	11
P02341	P29464	0.05	0	6
P02341	P30856	0.05	0	5
P02341	P32052	0.05	0	5
P02341	P32679	0.05	0	14
P02341	P36658	0.05	0	1
P02341	P36767	0.05	0	2
P02341	P36996	0.05	0	8
P02341	P39299	0.05	0	4
P02341	P45465	0.05	0	1
P02341	P45571	0.05	0	6
P02341	P50465	0.05	0	3
P02341	P75829	0.05	0	4
P02341	P76594	0.05	0	3
P02342	P03018	0.05	0	9
P02342	P03024	0.05	0	1
P02342	P04475	0.05	0	8
P02342	P05055	0.05	0	11
P02342	P06277	0.05	0	5
P02342	P06612	0.05	0	11
P02342	P07012	0.05	0	4
P02342	P07025	0.05	0	6
P02342	P07028	0.05	0	4
P02342	P08756	0.05	0	4
P02342	P08936	0.05	0	13
P02342	P10485	0.05	0	4
P02342	P11028	0.05	0	7
P02342	P14294	0.05	0	4
P02342	P15082	0.05	0	4
P02342	P15277	0.05	0	7
P02342	P15977	0.05	0	3
P02342	P17443	0.05	0	2
P02342	P17579	0.05	0	2
P02342	P17580	0.05	0	9
P02342	P18391	0.05	0	2
P02342	P19675	0.05	0	10
P02342	P21499	0.05	0	16
P02342	P22563	0.05	0	2
P02342	P23304	0.05	0	18
P02342	P24210	0.05	0	2
P02342	P24245	0.05	0	9
P02342	P25521	0.05	0	17
P02342	P25522	0.05	0	2
P02342	P25539	0.05	0	2
P02342	P29464	0.05	0	6
P02342	P30856	0.05	0	5
P02342	P32052	0.05	0	5
P02342	P32679	0.05	0	8
P02342	P33371	0.05	0	1
P02342	P33635	0.05	0	21
P02342	P36979	0.05	0	8
P02342	P36996	0.05	0	13
P02342	P36997	0.05	0	7
P02342	P37765	0.05	0	21
P02342	P45571	0.05	0	11
P02342	P75707	0.05	0	1
P02342	P75829	0.05	0	5
P02342	P77349	0.05	0	7
P02342	P77734	0.05	0	1
P02342	Q46930	0.05	0	7
P02349	P02351	0.05	0	37
P02349	P02356	0.05	0	39
P02349	P02364	0.05	0	20
P02349	P02374	0.05	0	13
P02349	P02999	0.05	0	8
P02349	P04951	0.05	0	1
P02349	P06277	0.05	0	10
P02349	P07028	0.05	0	6
P02349	P10443	0.05	0	2
P02349	P14081	0.05	0	8
P02349	P15038	0.05	0	1
P02349	P15082	0.05	0	3
P02349	P15716	0.05	0	11
P02349	P17580	0.05	0	14
P02349	P18391	0.05	0	6
P02349	P19675	0.05	0	7
P02349	P21499	0.05	0	21
P02349	P21774	0.05	0	6
P02349	P22257	0.05	0	5
P02349	P22563	0.05	0	3
P02349	P23304	0.05	0	22
P02349	P23367	0.05	0	1
P02349	P23830	0.05	0	12
P02349	P24245	0.05	0	10
P02349	P25521	0.05	0	16
P02349	P29132	0.05	0	2
P02349	P29209	0.05	0	4
P02349	P29464	0.05	0	5
P02349	P31805	0.05	0	1
P02349	P32049	0.05	0	7
P02349	P32052	0.05	0	6
P02349	P36659	0.05	0	8
P02349	P36979	0.05	0	14
P02349	P36996	0.05	0	14
P02349	P36997	0.05	0	9
P02349	P37765	0.05	0	24
P02349	P39286	0.05	0	3
P02349	P39299	0.05	0	4
P02349	P43329	0.05	0	12
P02349	P45567	0.05	0	6
P02349	P45571	0.05	0	10
P02349	P75829	0.05	0	6
P02349	P76104	0.05	0	4
P02349	P77349	0.05	0	10
P02349	Q46930	0.05	0	9
P02351	P02352	0.05	0	49
P02351	P02356	0.05	0	83
P02351	P02384	0.05	0	46
P02351	P02388	0.05	0	72
P02351	P02392	0.05	0	67
P02351	P02999	0.05	0	11
P02351	P03002	0.05	0	25
P02351	P03004	0.05	0	9
P02351	P03005	0.05	0	7
P02351	P03018	0.05	0	8
P02351	P03815	0.05	0	8
P02351	P04381	0.05	0	2
P02351	P04475	0.05	0	43
P02351	P04790	0.05	0	6
P02351	P05850	0.05	0	1
P02351	P06137	0.05	0	8
P02351	P06138	0.05	0	10
P02351	P06277	0.05	0	13
P02351	P06616	0.05	0	4
P02351	P06961	0.05	0	5
P02351	P06982	0.05	0	9
P02351	P06984	0.05	0	3
P02351	P07012	0.05	0	7
P02351	P07019	0.05	0	12
P02351	P07028	0.05	0	8
P02351	P07682	0.05	0	3
P02351	P07813	0.05	0	7
P02351	P07906	0.05	0	7
P02351	P08142	0.05	0	2
P02351	P08177	0.05	0	13
P02351	P08374	0.05	0	10
P02351	P08394	0.05	0	2
P02351	P08577	0.05	0	6
P02351	P08622	0.05	0	32
P02351	P08936	0.05	0	7
P02351	P09097	0.05	0	15
P02351	P09160	0.05	0	2
P02351	P09372	0.05	0	8
P02351	P0A6F5	0.05	0	29
P02351	P0A6F9	0.05	0	11
P02351	P0A6N1	0.05	0	58
P02351	P10115	0.05	0	5
P02351	P10408	0.05	0	28
P02351	P10440	0.05	0	3
P02351	P10441	0.05	0	2
P02351	P10443	0.05	0	10
P02351	P11028	0.05	0	7
P02351	P11604	0.05	0	2
P02351	P13445	0.05	0	4
P02351	P14294	0.05	0	7
P02351	P14825	0.05	0	10
P02351	P15042	0.05	0	5
P02351	P15082	0.05	0	6
P02351	P15716	0.05	0	26
P02351	P16528	0.05	0	4
P02351	P16921	0.05	0	19
P02351	P17113	0.05	0	1
P02351	P17114	0.05	0	1
P02351	P17288	0.05	0	8
P02351	P17443	0.05	0	4
P02351	P17547	0.05	0	4
P02351	P17579	0.05	0	10
P02351	P17580	0.05	0	18
P02351	P17952	0.05	0	7
P02351	P18133	0.05	0	1
P02351	P18391	0.05	0	8
P02351	P19245	0.05	0	14
P02351	P20082	0.05	0	7
P02351	P20083	0.05	0	7
P02351	P21346	0.05	0	11
P02351	P21499	0.05	0	22
P02351	P21507	0.05	0	19
P02351	P21513	0.05	0	17
P02351	P21645	0.05	0	13
P02351	P21774	0.05	0	13
P02351	P22188	0.05	0	4
P02351	P22257	0.05	0	10
P02351	P22523	0.05	0	12
P02351	P22634	0.05	0	4
P02351	P22939	0.05	0	4
P02351	P23282	0.05	0	5
P02351	P23304	0.05	0	28
P02351	P23830	0.05	0	16
P02351	P23839	0.05	0	5
P02351	P23892	0.05	0	4
P02351	P23932	0.05	0	5
P02351	P24210	0.05	0	4
P02351	P24245	0.05	0	11
P02351	P25521	0.05	0	27
P02351	P25522	0.05	0	3
P02351	P25539	0.05	0	4
P02351	P25739	0.05	0	1
P02351	P28689	0.05	0	7
P02351	P28692	0.05	0	8
P02351	P28905	0.05	0	11
P02351	P28909	0.05	0	5
P02351	P29209	0.05	0	9
P02351	P29464	0.05	0	15
P02351	P30128	0.05	0	3
P02351	P31120	0.05	0	6
P02351	P31473	0.05	0	6
P02351	P32049	0.05	0	11
P02351	P32052	0.05	0	10
P02351	P32168	0.05	0	12
P02351	P32177	0.05	0	4
P02351	P33224	0.05	0	14
P02351	P33232	0.05	0	2
P02351	P33371	0.05	0	3
P02351	P33918	0.05	0	2
P02351	P36540	0.05	0	5
P02351	P36564	0.05	0	8
P02351	P36659	0.05	0	20
P02351	P36979	0.05	0	26
P02351	P36995	0.05	0	4
P02351	P36996	0.05	0	20
P02351	P37175	0.05	0	2
P02351	P37181	0.05	0	3
P02351	P37195	0.05	0	4
P02351	P37765	0.05	0	31
P02351	P38506	0.05	0	2
P02351	P39286	0.05	0	8
P02351	P39290	0.05	0	2
P02351	P39299	0.05	0	13
P02351	P42184	0.05	0	15
P02351	P42550	0.05	0	17
P02351	P43329	0.05	0	14
P02351	P45567	0.05	0	10
P02351	P45571	0.05	0	19
P02351	P45748	0.05	0	2
P02351	P45802	0.05	0	3
P02351	P45803	0.05	0	4
P02351	P75707	0.05	0	3
P02351	P75767	0.05	0	4
P02351	P75829	0.05	0	13
P02351	P76578	0.05	0	4
P02351	P76594	0.05	0	7
P02351	P77254	0.05	0	3
P02351	P77319	0.05	0	4
P02351	P77349	0.05	0	17
P02351	Q46930	0.05	0	12
P02351	Q47130	0.05	0	5
P02352	P02354	0.05	0	44
P02352	P02356	0.05	0	62
P02352	P02369	0.05	0	31
P02352	P02388	0.05	0	51
P02352	P02392	0.05	0	36
P02352	P02424	0.05	0	17
P02352	P02999	0.05	0	11
P02352	P03003	0.05	0	11
P02352	P03004	0.05	0	7
P02352	P04742	0.05	0	3
P02352	P05055	0.05	0	17
P02352	P06277	0.05	0	12
P02352	P06612	0.05	0	11
P02352	P06709	0.05	0	1
P02352	P07028	0.05	0	8
P02352	P08177	0.05	0	5
P02352	P08390	0.05	0	6
P02352	P08756	0.05	0	8
P02352	P11876	0.05	0	2
P02352	P14081	0.05	0	13
P02352	P14294	0.05	0	7
P02352	P14374	0.05	0	5
P02352	P14825	0.05	0	6
P02352	P15277	0.05	0	10
P02352	P16921	0.05	0	14
P02352	P17288	0.05	0	4
P02352	P17579	0.05	0	8
P02352	P17580	0.05	0	18
P02352	P21168	0.05	0	3
P02352	P21499	0.05	0	23
P02352	P21507	0.05	0	21
P02352	P21513	0.05	0	19
P02352	P21645	0.05	0	11
P02352	P21774	0.05	0	9
P02352	P22523	0.05	0	7
P02352	P23304	0.05	0	27
P02352	P23830	0.05	0	20
P02352	P24229	0.05	0	6
P02352	P24245	0.05	0	12
P02352	P25521	0.05	0	24
P02352	P28630	0.05	0	2
P02352	P29464	0.05	0	7
P02352	P32049	0.05	0	12
P02352	P32052	0.05	0	5
P02352	P33594	0.05	0	3
P02352	P33635	0.05	0	28
P02352	P36659	0.05	0	16
P02352	P36979	0.05	0	24
P02352	P36996	0.05	0	20
P02352	P37765	0.05	0	32
P02352	P39286	0.05	0	6
P02352	P39299	0.05	0	7
P02352	P42184	0.05	0	13
P02352	P43329	0.05	0	13
P02352	P45567	0.05	0	13
P02352	P45571	0.05	0	18
P02352	P45802	0.05	0	3
P02352	P45803	0.05	0	3
P02352	P75829	0.05	0	12
P02352	P75960	0.05	0	3
P02352	P76104	0.05	0	5
P02352	P76195	0.05	0	3
P02352	P76316	0.05	0	4
P02352	P77254	0.05	0	3
P02352	P77349	0.05	0	15
P02352	Q46930	0.05	0	13
P02354	P02356	0.05	0	49
P02354	P02361	0.05	0	16
P02354	P02384	0.05	0	38
P02354	P02388	0.05	0	46
P02354	P02420	0.05	0	37
P02354	P02999	0.05	0	11
P02354	P03003	0.05	0	13
P02354	P04381	0.05	0	2
P02354	P04742	0.05	0	5
P02354	P05055	0.05	0	16
P02354	P06277	0.05	0	13
P02354	P06984	0.05	0	4
P02354	P07019	0.05	0	7
P02354	P07028	0.05	0	9
P02354	P08756	0.05	0	10
P02354	P08999	0.05	0	1
P02354	P14081	0.05	0	11
P02354	P14374	0.05	0	7
P02354	P15277	0.05	0	11
P02354	P15716	0.05	0	10
P02354	P17579	0.05	0	7
P02354	P17580	0.05	0	15
P02354	P21499	0.05	0	23
P02354	P21513	0.05	0	14
P02354	P21645	0.05	0	11
P02354	P21774	0.05	0	11
P02354	P23304	0.05	0	23
P02354	P23830	0.05	0	14
P02354	P24229	0.05	0	7
P02354	P24245	0.05	0	13
P02354	P25521	0.05	0	23
P02354	P25537	0.05	0	4
P02354	P25539	0.05	0	3
P02354	P28692	0.05	0	6
P02354	P32049	0.05	0	9
P02354	P33224	0.05	0	9
P02354	P33594	0.05	0	2
P02354	P33635	0.05	0	26
P02354	P33918	0.05	0	2
P02354	P36659	0.05	0	15
P02354	P36979	0.05	0	18
P02354	P36996	0.05	0	19
P02354	P36997	0.05	0	11
P02354	P37195	0.05	0	5
P02354	P37765	0.05	0	30
P02354	P39299	0.05	0	7
P02354	P42184	0.05	0	11
P02354	P45567	0.05	0	10
P02354	P50465	0.05	0	2
P02354	P75829	0.05	0	10
P02354	P75960	0.05	0	3
P02354	P76316	0.05	0	5
P02354	P77349	0.05	0	13
P02354	Q46906	0.05	0	4
P02354	Q46930	0.05	0	12
P02356	P02358	0.05	0	39
P02356	P02359	0.05	0	72
P02356	P02361	0.05	0	19
P02356	P02363	0.05	0	17
P02356	P02364	0.05	0	54
P02356	P02367	0.05	0	12
P02356	P02369	0.05	0	42
P02356	P02372	0.05	0	31
P02356	P02375	0.05	0	17
P02356	P02378	0.05	0	38
P02356	P02384	0.05	0	53
P02356	P02386	0.05	0	71
P02356	P02388	0.05	0	71
P02356	P02392	0.05	0	47
P02356	P02422	0.05	0	45
P02356	P02990	0.05	0	37
P02356	P02997	0.05	0	3
P02356	P02999	0.05	0	23
P02356	P03003	0.05	0	17
P02356	P03004	0.05	0	15
P02356	P03005	0.05	0	8
P02356	P03018	0.05	0	10
P02356	P03020	0.05	0	7
P02356	P03033	0.05	0	1
P02356	P03843	0.05	0	2
P02356	P04381	0.05	0	5
P02356	P04742	0.05	0	10
P02356	P05055	0.05	0	23
P02356	P05100	0.05	0	1
P02356	P06138	0.05	0	8
P02356	P06277	0.05	0	23
P02356	P06612	0.05	0	15
P02356	P06616	0.05	0	4
P02356	P06982	0.05	0	9
P02356	P07012	0.05	0	6
P02356	P07019	0.05	0	12
P02356	P07028	0.05	0	19
P02356	P07682	0.05	0	6
P02356	P07906	0.05	0	8
P02356	P08324	0.05	0	9
P02356	P08622	0.05	0	26
P02356	P08756	0.05	0	15
P02356	P09097	0.05	0	10
P02356	P0A6N1	0.05	0	36
P02356	P10115	0.05	0	9
P02356	P11028	0.05	0	9
P02356	P11876	0.05	0	7
P02356	P14081	0.05	0	20
P02356	P14294	0.05	0	11
P02356	P15082	0.05	0	8
P02356	P15277	0.05	0	15
P02356	P16528	0.05	0	9
P02356	P16921	0.05	0	19
P02356	P17288	0.05	0	12
P02356	P17579	0.05	0	18
P02356	P17580	0.05	0	29
P02356	P18391	0.05	0	12
P02356	P19675	0.05	0	17
P02356	P21346	0.05	0	11
P02356	P21499	0.05	0	35
P02356	P21513	0.05	0	28
P02356	P21645	0.05	0	19
P02356	P21774	0.05	0	16
P02356	P22257	0.05	0	10
P02356	P22523	0.05	0	15
P02356	P22563	0.05	0	6
P02356	P23282	0.05	0	6
P02356	P23304	0.05	0	43
P02356	P23830	0.05	0	23
P02356	P23852	0.05	0	8
P02356	P23875	0.05	0	4
P02356	P24229	0.05	0	17
P02356	P24245	0.05	0	19
P02356	P25521	0.05	0	41
P02356	P25537	0.05	0	9
P02356	P27430	0.05	0	9
P02356	P28692	0.05	0	10
P02356	P28905	0.05	0	8
P02356	P29464	0.05	0	15
P02356	P30128	0.05	0	6
P02356	P30850	0.05	0	1
P02356	P31120	0.05	0	7
P02356	P32049	0.05	0	17
P02356	P32052	0.05	0	10
P02356	P32168	0.05	0	11
P02356	P32679	0.05	0	10
P02356	P33224	0.05	0	18
P02356	P33371	0.05	0	4
P02356	P33635	0.05	0	42
P02356	P36564	0.05	0	11
P02356	P36659	0.05	0	22
P02356	P36979	0.05	0	31
P02356	P36996	0.05	0	29
P02356	P36997	0.05	0	16
P02356	P37765	0.05	0	44
P02356	P39290	0.05	0	5
P02356	P39299	0.05	0	23
P02356	P42184	0.05	0	22
P02356	P43329	0.05	0	20
P02356	P45567	0.05	0	22
P02356	P45571	0.05	0	27
P02356	P45748	0.05	0	4
P02356	P45802	0.05	0	5
P02356	P45803	0.05	0	9
P02356	P52648	0.05	0	3
P02356	P75767	0.05	0	8
P02356	P75829	0.05	0	22
P02356	P76104	0.05	0	10
P02356	P76195	0.05	0	6
P02356	P76316	0.05	0	7
P02356	P76503	0.05	0	2
P02356	P76578	0.05	0	6
P02356	P76594	0.05	0	11
P02356	P77349	0.05	0	23
P02356	P77734	0.05	0	7
P02356	Q46930	0.05	0	20
P02356	Q47130	0.05	0	6
P02358	P02374	0.05	0	17
P02358	P02379	0.05	0	14
P02358	P02901	0.05	0	4
P02358	P02999	0.05	0	7
P02358	P03018	-0.412344	1.67328	6
P02358	P04742	0.05	0	3
P02358	P06277	0.05	0	9
P02358	P06710	0.739044	2.57869	4
P02358	P07012	0.932736	3.21102	4
P02358	P07028	0.05	0	5
P02358	P07682	0.05	0	2
P02358	P08622	-0.081367	2.56269	22
P02358	P08756	0.05	0	3
P02358	P0A6A8	0.420979	1.67328	4
P02358	P0A6Q3	0.832656	1.67328	2
P02358	P0A6X3	0.149044	2.8966	15
P02358	P0A707	0.134797	2.93578	11
P02358	P0A776	0.281901	1.88084	8
P02358	P0A799	0.26719	1.67328	6
P02358	P0A7E9	0.879195	1.67328	3
P02358	P0A7R1	0.963183	4.87983	24
P02358	P0A7Y8	0.935251	1.92661	8
P02358	P0A7Z4	0.716286	2.01375	14
P02358	P0A8E5	-0.337778	0	6
P02358	P0A8G0	-0.325163	2.3611	3
P02358	P0A8I5	0.509046	1.79859	4
P02358	P0A8J8	0.720491	1.80019	6
P02358	P0A8M6	0.313444	0	13
P02358	P0A8V2	0.729699	2.01375	8
P02358	P0A8W8	-0.030101	0.437463	6
P02358	P0A9P6	-0.201164	3.08513	21
P02358	P0A9X4	0.784373	3.01611	5
P02358	P0A9Y6	0.502195	2.41253	17
P02358	P0AA39	0.858006	1.92661	12
P02358	P0AAS7	0.204	0	14
P02358	P0ABH9	-0.81274	2.94786	10
P02358	P0ABT2	-0.516261	2.19559	5
P02358	P0ABU7	-0.073125	1.25859	5
P02358	P0ACN4	-0.206299	1.81671	1
P02358	P0ADH5	0.328633	2.06333	1
P02358	P0ADS6	-0.794798	0.328097	2
P02358	P0AEB7	0.725257	0	1
P02358	P0AF63	-0.5966	2.57869	2
P02358	P0AFG0	0.850751	2.01375	7
P02358	P0AGJ5	0.076949	1.76606	24
P02358	P0AGK4	0.904402	0	13
P02358	P10413	0.05	0	1
P02358	P11665	0.05	0	3
P02358	P13519	0.05	0	7
P02358	P14081	0.193745	3.09376	11
P02358	P15716	0.05	0	10
P02358	P16528	-0.050197	2.06333	2
P02358	P16921	0.05	0	9
P02358	P17580	0.05	0	12
P02358	P19245	0.05	0	3
P02358	P21499	-0.531428	1.67328	32
P02358	P21513	-0.384964	1.73129	21
P02358	P23304	0.05	0	21
P02358	P24210	0.05	0	1
P02358	P24229	0.05	0	4
P02358	P25521	0.05	0	19
P02358	P25522	0.433283	1.64143	1
P02358	P27430	0.05	0	4
P02358	P28689	0.05	0	3
P02358	P29209	0.05	0	6
P02358	P32049	0.05	0	5
P02358	P32679	0.05	0	6
P02358	P32701	-0.090561	0	1
P02358	P33224	-0.30206	1.67328	14
P02358	P33570	-0.266184	0.756164	2
P02358	P33635	0.05	0	22
P02358	P36879	-0.416199	0.637985	3
P02358	P36979	0.506392	1.73836	21
P02358	P36996	0.05	0	12
P02358	P37751	0.742164	1.82438	7
P02358	P37765	-0.059733	1.88084	35
P02358	P45567	0.05	0	7
P02358	P45571	0.05	0	12
P02358	P46923	-0.357184	0.660253	3
P02358	P63228	-0.3688	1.67328	2
P02358	P64581	-0.526454	0	2
P02358	P64588	0.098154	2.06333	5
P02358	P68739	0.475909	1.67328	3
P02358	P69913	-0.307329	3.21102	12
P02358	P75767	-0.423442	0	3
P02358	P75829	0.445271	0.437463	8
P02358	P75876	0.849878	1.68328	7
P02358	P76116	-0.212441	0	10
P02358	P76316	-0.688299	0.687559	3
P02358	P76550	0.154461	0	2
P02358	P77293	0.729565	0	2
P02358	P77734	0.05	0	2
P02358	Q46856	-0.356352	0.451438	3
P02358	Q46930	0.05	0	9
P02359	P02367	0.05	0	11
P02359	P02388	0.05	0	61
P02359	P02392	0.05	0	41
P02359	P02901	0.05	0	9
P02359	P02923	0.05	0	4
P02359	P02999	0.05	0	10
P02359	P03003	0.05	0	9
P02359	P03004	0.63058	2.02718	4
P02359	P03018	-0.082895	1.63605	7
P02359	P03815	0.05	0	6
P02359	P03843	0.05	0	2
P02359	P04742	0.05	0	2
P02359	P05055	0.561591	2.2804	14
P02359	P06277	0.05	0	10
P02359	P06612	0.784075	2.72589	8
P02359	P07028	0.05	0	7
P02359	P07682	0.05	0	3
P02359	P08177	0.05	0	7
P02359	P08374	0.05	0	10
P02359	P08756	0.05	0	8
P02359	P09372	0.573082	1.93877	3
P02359	P10115	0.05	0	4
P02359	P10413	0.05	0	3
P02359	P10485	0.05	0	3
P02359	P11876	0.05	0	3
P02359	P14081	-0.18152	3.27453	10
P02359	P14825	0.05	0	5
P02359	P15038	-0.837524	1.79425	3
P02359	P15277	0.05	0	10
P02359	P15716	0.05	0	17
P02359	P16528	-0.513039	2.14541	4
P02359	P16921	0.05	0	11
P02359	P17288	0.05	0	5
P02359	P17579	0.05	0	6
P02359	P17580	0.05	0	19
P02359	P17963	0.05	0	10
P02359	P18391	0.05	0	4
P02359	P19245	0.05	0	10
P02359	P19675	0.05	0	12
P02359	P21346	0.05	0	8
P02359	P21499	-0.626444	2.11589	21
P02359	P21513	-0.522845	2.13659	13
P02359	P21645	0.502808	1.197	12
P02359	P21774	0.05	0	9
P02359	P22257	0.05	0	9
P02359	P22523	0.370246	2.9843	8
P02359	P22563	0.05	0	4
P02359	P23304	0.05	0	26
P02359	P23830	0.227054	1.11737	16
P02359	P24191	0.05	0	2
P02359	P24210	0.05	0	2
P02359	P24229	0.05	0	4
P02359	P24245	0.05	0	10
P02359	P25521	0.05	0	25
P02359	P25522	0.480996	1.37872	3
P02359	P25539	0.031782	0.949511	3
P02359	P25663	0.05	0	3
P02359	P28691	0.05	0	5
P02359	P28692	0.05	0	5
P02359	P29209	0.05	0	7
P02359	P29464	0.05	0	8
P02359	P30745	-0.610249	2.73843	1
P02359	P31059	0.05	0	6
P02359	P32049	0.05	0	8
P02359	P32168	0.05	0	7
P02359	P32679	0.05	0	9
P02359	P33224	-0.262718	1.84035	11
P02359	P33371	0.474276	1.4942	2
P02359	P33594	-0.131857	0.62146	1
P02359	P33635	0.05	0	31
P02359	P36540	0.05	0	5
P02359	P36564	0.05	0	7
P02359	P36659	-0.715065	2.73843	15
P02359	P36979	0.828958	2.56942	22
P02359	P36996	0.05	0	19
P02359	P36997	0.05	0	11
P02359	P37765	0.229557	2.91967	32
P02359	P39159	0.05	0	3
P02359	P39286	0.202435	3.37323	3
P02359	P39290	0.05	0	2
P02359	P39299	0.05	0	6
P02359	P42184	0.05	0	9
P02359	P42550	0.05	0	19
P02359	P43329	0.281201	1.61813	12
P02359	P45802	0.05	0	2
P02359	P45803	0.05	0	3
P02359	P75767	-0.138005	0	3
P02359	P75829	-0.038874	0.437463	10
P02359	P76086	-0.529202	2.14541	2
P02359	P76104	0.462275	2.45655	5
P02359	P76195	0.05	0	6
P02359	P77349	0.05	0	13
P02359	P77734	0.05	0	3
P02359	Q46930	0.05	0	9
P02361	P02384	0.05	0	11
P02361	P02428	0.05	0	10
P02361	P02901	0.05	0	6
P02361	P02999	0.05	0	5
P02361	P03815	0.05	0	1
P02361	P04742	0.05	0	4
P02361	P06277	0.05	0	7
P02361	P07028	0.05	0	6
P02361	P08177	0.05	0	2
P02361	P08756	0.05	0	4
P02361	P16528	0.05	0	3
P02361	P17288	0.05	0	3
P02361	P17580	0.05	0	7
P02361	P21499	0.05	0	7
P02361	P21645	0.05	0	5
P02361	P23304	0.05	0	11
P02361	P27430	0.05	0	4
P02361	P33635	0.05	0	11
P02361	P39299	0.05	0	5
P02361	P42184	0.05	0	5
P02363	P02369	0.05	0	13
P02363	P02420	0.05	0	11
P02363	P02435	0.05	0	1
P02363	P02999	0.05	0	6
P02363	P03004	0.05	0	3
P02363	P06277	0.05	0	6
P02363	P10115	0.05	0	2
P02363	P10440	0.05	0	1
P02363	P17579	0.05	0	4
P02363	P17580	0.05	0	5
P02363	P18391	0.05	0	5
P02363	P21499	0.05	0	7
P02363	P23304	0.05	0	10
P02363	P25537	0.05	0	4
P02363	P33918	0.05	0	2
P02363	P36996	0.05	0	6
P02363	P39299	0.05	0	4
P02363	P45571	0.05	0	5
P02364	P02388	0.05	0	42
P02364	P02999	0.05	0	5
P02364	P03004	0.05	0	4
P02364	P03020	0.05	0	5
P02364	P03815	0.05	0	4
P02364	P04381	0.05	0	2
P02364	P05852	0.05	0	4
P02364	P06138	0.05	0	4
P02364	P06277	0.05	0	8
P02364	P06612	0.05	0	10
P02364	P07012	0.05	0	5
P02364	P07028	0.05	0	5
P02364	P07682	0.05	0	4
P02364	P07813	0.05	0	4
P02364	P07906	0.05	0	5
P02364	P08374	0.05	0	8
P02364	P08577	0.05	0	3
P02364	P08622	0.05	0	17
P02364	P10115	0.05	0	2
P02364	P10440	0.05	0	1
P02364	P11028	0.05	0	5
P02364	P14374	0.05	0	5
P02364	P14825	0.05	0	7
P02364	P15277	0.05	0	7
P02364	P15716	0.05	0	13
P02364	P16921	0.05	0	12
P02364	P17288	0.05	0	3
P02364	P17579	0.05	0	3
P02364	P17580	0.05	0	12
P02364	P18595	0.05	0	1
P02364	P19245	0.05	0	5
P02364	P20082	0.05	0	3
P02364	P21346	0.05	0	8
P02364	P21513	0.05	0	8
P02364	P21645	0.05	0	5
P02364	P22523	0.05	0	8
P02364	P22939	0.05	0	1
P02364	P23282	0.05	0	2
P02364	P23304	0.05	0	16
P02364	P23892	0.05	0	1
P02364	P23932	0.05	0	2
P02364	P24229	0.05	0	3
P02364	P24245	0.05	0	7
P02364	P25522	0.05	0	3
P02364	P25538	0.05	0	2
P02364	P27430	0.05	0	5
P02364	P28631	0.05	0	3
P02364	P28689	0.05	0	5
P02364	P28905	0.05	0	8
P02364	P28909	0.05	0	3
P02364	P29132	0.05	0	2
P02364	P29464	0.05	0	6
P02364	P31120	0.05	0	3
P02364	P32168	0.05	0	5
P02364	P33371	0.05	0	2
P02364	P33918	0.05	0	2
P02364	P36663	0.05	0	1
P02364	P36979	0.05	0	15
P02364	P36995	0.05	0	3
P02364	P36996	0.05	0	13
P02364	P36997	0.05	0	8
P02364	P37175	0.05	0	1
P02364	P37181	0.05	0	1
P02364	P37765	0.05	0	17
P02364	P39178	0.05	0	1
P02364	P39199	0.05	0	1
P02364	P39286	0.05	0	3
P02364	P39290	0.05	0	2
P02364	P39299	0.05	0	7
P02364	P42184	0.05	0	7
P02364	P45567	0.05	0	11
P02364	P45748	0.05	0	2
P02364	P45802	0.05	0	2
P02364	P45803	0.05	0	2
P02364	P52054	0.05	0	1
P02364	P75707	0.05	0	1
P02364	P76028	0.05	0	2
P02364	P76578	0.05	0	4
P02364	P76594	0.05	0	5
P02364	P77756	0.05	0	1
P02366	P02379	0.05	0	7
P02366	P02388	0.05	0	10
P02366	P02999	0.05	0	5
P02366	P06277	0.05	0	6
P02366	P07019	0.05	0	2
P02366	P07028	0.05	0	3
P02366	P14825	0.05	0	1
P02366	P17579	0.05	0	3
P02366	P17580	0.05	0	4
P02366	P21499	0.05	0	6
P02366	P23304	0.05	0	7
P02366	P33635	0.05	0	8
P02366	P45567	0.05	0	3
P02367	P02410	0.05	0	9
P02367	P02414	0.05	0	3
P02367	P02422	0.05	0	11
P02367	P02435	0.05	0	1
P02367	P02998	0.05	0	1
P02367	P07028	0.05	0	6
P02367	P17580	0.05	0	5
P02367	P19675	0.05	0	6
P02367	P33224	0.05	0	5
P02367	P33635	0.05	0	6
P02367	P39299	0.05	0	5
P02367	P45567	0.05	0	5
P02367	P45803	0.05	0	3
P02367	P76086	0.05	0	4
P02367	P77734	0.05	0	4
P02369	P02375	0.05	0	15
P02369	P02379	0.05	0	12
P02369	P02388	0.05	0	32
P02369	P02419	0.05	0	8
P02369	P02901	0.05	0	2
P02369	P02995	0.05	0	4
P02369	P02999	0.05	0	12
P02369	P03004	0.05	0	6
P02369	P05055	0.05	0	11
P02369	P06277	0.05	0	10
P02369	P06612	0.05	0	7
P02369	P07028	0.05	0	7
P02369	P08374	0.05	0	5
P02369	P08622	0.05	0	12
P02369	P08756	0.05	0	7
P02369	P11028	0.05	0	5
P02369	P11457	0.05	0	4
P02369	P16528	0.05	0	3
P02369	P17579	0.05	0	6
P02369	P18391	0.05	0	4
P02369	P21499	0.05	0	19
P02369	P22563	0.05	0	3
P02369	P23304	0.05	0	25
P02369	P24210	0.05	0	2
P02369	P24245	0.05	0	12
P02369	P25521	0.05	0	18
P02369	P25537	0.05	0	7
P02369	P31059	0.05	0	4
P02369	P32049	0.05	0	9
P02369	P32679	0.05	0	6
P02369	P33635	0.05	0	21
P02369	P33918	0.05	0	3
P02369	P36659	0.05	0	8
P02369	P36996	0.05	0	18
P02369	P37765	0.05	0	21
P02369	P39286	0.05	0	3
P02369	P39299	0.05	0	8
P02369	P43329	0.05	0	11
P02369	P45567	0.05	0	11
P02369	P75829	0.05	0	9
P02369	P76594	0.05	0	5
P02369	P77349	0.05	0	9
P02369	P77734	0.05	0	3
P02369	Q46930	0.05	0	11
P02370	P02375	0.05	0	9
P02370	P02392	0.05	0	26
P02370	P02999	0.05	0	6
P02370	P03004	0.05	0	3
P02370	P03018	0.05	0	6
P02370	P03815	0.05	0	3
P02370	P04742	0.05	0	1
P02370	P06277	0.05	0	8
P02370	P06709	0.05	0	1
P02370	P07028	0.05	0	4
P02370	P08622	0.05	0	9
P02370	P11665	0.05	0	1
P02370	P11876	0.05	0	2
P02370	P14294	0.05	0	5
P02370	P15043	0.05	0	4
P02370	P15277	0.05	0	6
P02370	P15716	0.05	0	10
P02370	P16528	0.05	0	1
P02370	P16921	0.05	0	8
P02370	P17288	0.05	0	1
P02370	P17579	0.05	0	3
P02370	P17580	0.05	0	8
P02370	P19675	0.05	0	9
P02370	P21202	0.05	0	2
P02370	P21499	0.05	0	13
P02370	P22563	0.05	0	2
P02370	P23304	0.05	0	16
P02370	P23830	0.05	0	10
P02370	P24210	0.05	0	1
P02370	P24245	0.05	0	7
P02370	P25522	0.05	0	2
P02370	P27290	0.05	0	1
P02370	P28905	0.05	0	5
P02370	P32052	0.05	0	5
P02370	P32679	0.05	0	4
P02370	P33224	0.05	0	6
P02370	P33635	0.05	0	18
P02370	P33937	0.05	0	2
P02370	P33995	0.05	0	2
P02370	P36540	0.05	0	3
P02370	P36564	0.05	0	5
P02370	P36979	0.05	0	13
P02370	P36996	0.05	0	12
P02370	P37181	0.05	0	2
P02370	P37765	0.05	0	16
P02370	P39286	0.05	0	2
P02370	P39299	0.05	0	5
P02370	P45567	0.05	0	5
P02370	P50465	0.05	0	2
P02370	P75960	0.05	0	1
P02370	P76104	0.05	0	3
P02370	P76594	0.05	0	4
P02370	P77349	0.05	0	8
P02370	P77734	0.05	0	1
P02371	P02999	0.05	0	4
P02371	P05055	0.05	0	2
P02371	P06277	0.05	0	3
P02371	P07028	0.05	0	2
P02371	P21499	0.05	0	4
P02371	P23304	0.05	0	4
P02371	P25537	0.05	0	2
P02371	P32679	0.05	0	2
P02371	P33635	0.05	0	6
P02371	P76211	0.05	0	2
P02371	P77734	0.05	0	1
P02372	P02999	0.05	0	6
P02372	P04742	0.05	0	2
P02372	P06277	0.05	0	7
P02372	P07813	0.05	0	2
P02372	P07906	0.05	0	4
P02372	P10115	0.05	0	2
P02372	P10443	0.05	0	3
P02372	P14294	0.05	0	3
P02372	P15716	0.05	0	9
P02372	P16921	0.05	0	6
P02372	P17580	0.05	0	11
P02372	P19245	0.05	0	4
P02372	P21499	0.05	0	13
P02372	P21513	0.05	0	9
P02372	P21645	0.05	0	6
P02372	P21893	0.05	0	2
P02372	P22523	0.05	0	5
P02372	P22563	0.05	0	3
P02372	P23304	0.05	0	17
P02372	P23839	0.05	0	1
P02372	P24229	0.05	0	3
P02372	P25521	0.05	0	12
P02372	P28631	0.05	0	4
P02372	P28689	0.05	0	4
P02372	P29464	0.05	0	4
P02372	P31059	0.05	0	3
P02372	P31473	0.05	0	1
P02372	P32049	0.05	0	5
P02372	P33635	0.05	0	19
P02372	P33918	0.05	0	1
P02372	P36659	0.05	0	10
P02372	P36979	0.05	0	11
P02372	P36997	0.05	0	5
P02372	P37765	0.05	0	17
P02372	P39286	0.05	0	1
P02372	P42184	0.05	0	6
P02372	P45748	0.05	0	2
P02372	P77349	0.05	0	7
P02373	P07012	0.05	0	1
P02374	P02379	0.05	0	8
P02374	P02392	0.05	0	10
P02374	P02998	0.05	0	1
P02374	P02999	0.05	0	8
P02374	P04742	0.05	0	2
P02374	P05055	0.05	0	4
P02374	P06277	0.05	0	9
P02374	P07012	0.05	0	3
P02374	P07028	0.05	0	4
P02374	P17580	0.05	0	11
P02374	P18391	0.05	0	3
P02374	P21499	0.05	0	12
P02374	P21645	0.05	0	5
P02374	P23304	0.05	0	14
P02374	P25521	0.05	0	12
P02374	P32679	0.05	0	4
P02374	P33635	0.05	0	14
P02374	P36979	0.05	0	11
P02374	P37765	0.05	0	15
P02374	Q46930	0.05	0	9
P02375	P02999	0.05	0	6
P02375	P05055	0.05	0	5
P02375	P07028	0.05	0	5
P02375	P08756	0.05	0	3
P02375	P23304	0.05	0	7
P02375	P24229	0.05	0	3
P02375	P25537	0.05	0	4
P02375	P33224	0.05	0	3
P02375	P33635	0.05	0	9
P02375	P39299	0.05	0	5
P02375	P43329	0.05	0	5
P02375	P75829	0.05	0	3
P02375	P76594	0.05	0	5
P02375	Q46930	0.05	0	5
P02378	P02999	0.05	0	5
P02378	P03004	0.05	0	2
P02378	P04742	0.05	0	2
P02378	P05055	0.05	0	10
P02378	P06277	0.05	0	6
P02378	P06612	0.05	0	7
P02378	P07028	0.05	0	4
P02378	P07906	0.05	0	3
P02378	P08374	0.05	0	6
P02378	P11665	0.05	0	3
P02378	P11876	0.05	0	2
P02378	P14081	0.05	0	5
P02378	P17288	0.05	0	2
P02378	P17579	0.05	0	3
P02378	P17580	0.05	0	8
P02378	P21170	0.05	0	1
P02378	P21499	0.05	0	14
P02378	P21513	0.05	0	10
P02378	P21645	0.05	0	4
P02378	P23304	0.05	0	15
P02378	P24169	0.05	0	1
P02378	P24229	0.05	0	4
P02378	P24245	0.05	0	9
P02378	P25537	0.05	0	3
P02378	P32049	0.05	0	5
P02378	P33224	0.05	0	5
P02378	P33633	0.05	0	1
P02378	P33635	0.05	0	19
P02378	P36996	0.05	0	12
P02378	P37765	0.05	0	20
P02378	P39299	0.05	0	3
P02378	P42184	0.05	0	5
P02378	P45567	0.05	0	6
P02378	P75829	0.05	0	4
P02378	P75960	0.05	0	2
P02378	P76594	0.05	0	4
P02378	P77349	0.05	0	7
P02378	Q46930	0.05	0	8
P02379	P02999	0.05	0	8
P02379	P06277	0.05	0	10
P02379	P14374	0.05	0	2
P02379	P15716	0.05	0	4
P02379	P21499	0.05	0	12
P02379	P21513	0.05	0	6
P02379	P23304	0.05	0	12
P02379	P23830	0.05	0	7
P02379	P24245	0.05	0	6
P02379	P25537	0.05	0	3
P02379	P32049	0.05	0	6
P02379	P33635	0.05	0	15
P02379	P37765	0.05	0	11
P02379	P39290	0.05	0	1
P02379	P45567	0.05	0	6
P02384	P02386	0.05	0	47
P02384	P02388	0.05	0	45
P02384	P02424	0.05	0	18
P02384	P02436	0.05	0	16
P02384	P02923	0.05	0	3
P02384	P03003	0.05	0	8
P02384	P03005	0.05	0	7
P02384	P03007	0.05	0	8
P02384	P05055	0.05	0	16
P02384	P06277	0.05	0	11
P02384	P06710	0.05	0	7
P02384	P06984	0.05	0	6
P02384	P07019	0.05	0	9
P02384	P07028	0.05	0	9
P02384	P08622	0.05	0	14
P02384	P08756	0.05	0	10
P02384	P10443	0.05	0	8
P02384	P11876	0.05	0	3
P02384	P13445	0.05	0	3
P02384	P14081	0.05	0	13
P02384	P15082	0.05	0	8
P02384	P15277	0.05	0	12
P02384	P16528	0.05	0	5
P02384	P17579	0.05	0	8
[truncated: 9,497 more rows]
